# Supplementary material for: Smoking Status and Survival in Patients With Early-Stage Primary Cutaneous Melanoma
Source: PubMed Central journal article supplement (PMC10848058; doi:10.1001/jamanetworkopen.2023.54751), 2024-02-06
Supplement: jamanetwopen-e2354751-s001.pdf [file jamanetwopen-e2354751-s001.pdf]

## Supplementary Online Content

Jackson KM, Jones PC, Fluke LM, et al. Smoking status and survival in patients with early-stage primary cutaneous melanoma. *JAMA Netw Open*. 2024;7(2):e2354751. doi:10.1001/jamanetworkopen.2023.54751

**eTable 1.** Multivariate MSS, Overall Study Population (N = 6279)

**eTable 2.** Multivariate MSS by SLNB Status, MSLT1

**eTable 3.** Multivariate MSS by SLNB Status, MSLT2

**eTable 4.** Multivariate MSS by RT-PCR vs Histopathologic Analysis

**eTable 5.** Multivariate MSS in Current and Former Smokers

**eTable 6.** Multivariate MSS by SLNB Status in Current and Former Smokers

**eTable 7.** Multivariate MSS in Current and Never Smokers

**eTable 8.** Multivariate MSS by SLNB Status in Current and Never Smokers

This supplementary material has been provided by the authors to give readers additional information about their work.

**eTable 1.** Multivariate MSS, Overall Study Population (N = 6279)

| Parameter             | All Patients (n=6279) |             |         |
|-----------------------|-----------------------|-------------|---------|
|                       | HR                    | 95% CI      | p-value |
| <b>Age, years</b>     | 1.01                  | (1.01-1.02) | <0.001  |
| <b>Gender</b>         |                       |             |         |
| Female (ref)          | 1.00                  |             |         |
| Male                  | 1.29                  | (1.12-1.48) | <0.001  |
| <b>Breslow, mm</b>    | 1.10                  | (1.08-1.12) | <0.001  |
| <b>Ulceration</b>     |                       |             |         |
| Absent (ref)          | 1.00                  |             |         |
| Present               | 2.27                  | (1.99-2.58) | <0.001  |
| <b>Primary Site</b>   |                       |             |         |
| Extremity (ref)       | 1.00                  |             |         |
| Head/Neck             | 1.23                  | (1.01-1.49) | 0.042   |
| Trunk                 | 1.37                  | (1.18-1.58) | <0.001  |
| <b>Smoking Status</b> |                       |             |         |
| Current               | 1.48                  | (1.26-1.75) | <0.001  |
| Former                | 1.03                  | (0.89-1.20) | 0.678   |
| Never (ref)           | 1.00                  |             |         |
| <b>SLNB Status</b>    |                       |             |         |
| No SLNB               | 1.73                  | (1.41-2.11) | <0.001  |
| SLNB Negative (ref)   | 1.00                  |             |         |
| SLNB Positive         | 2.46                  | (2.13-2.85) | <0.001  |

**eTable 2.** Multivariate MSS by SLNB Status, MSLT1

| Parameter             | No SLNB (n=741) |             |         | SLNB Negative (n=876) |             |         | SLNB Positive (n=203) |             |         |
|-----------------------|-----------------|-------------|---------|-----------------------|-------------|---------|-----------------------|-------------|---------|
|                       | HR              | 95% CI      | p-value | HR                    | 95% CI      | p-value | HR                    | 95% CI      | p-value |
| <b>Age, years</b>     | 1.02            | (1.00-1.03) | 0.006   | 1.01                  | (1.00-1.03) | 0.077   | 1.02                  | (1.00-1.04) | 0.053   |
| <b>Gender</b>         |                 |             |         |                       |             |         |                       |             |         |
| Female (ref)          | 1.00            |             |         | 1.00                  |             |         | 1.00                  |             |         |
| Male                  | 1.34            | (0.92-1.96) | 0.131   | 1.00                  | (0.68-1.46) | 0.996   | 1.23                  | (0.76-2.01) | 0.404   |
| <b>Breslow, mm</b>    | 1.09            | (1.06-1.13) | <0.001  | 1.19                  | (1.10-1.28) | <0.001  | 1.06                  | (0.96-1.17) | 0.290   |
| <b>Ulceration</b>     |                 |             |         |                       |             |         |                       |             |         |
| Absent (ref)          | 1.00            |             |         | 1.00                  |             |         | 1.00                  |             |         |
| Present               | 1.75            | (1.26-2.44) | 0.001   | 2.04                  | (1.44-2.90) | <0.001  | 2.14                  | (1.34-3.41) | 0.002   |
| <b>Primary Site</b>   |                 |             |         |                       |             |         |                       |             |         |
| Extremity (ref)       | 1.00            |             |         | 1.00                  |             |         | 1.00                  |             |         |
| Head/Neck             | 1.14            | (0.68-1.90) | 0.612   | 1.33                  | (0.80-2.22) | 0.274   | 1.73                  | (0.84-3.54) | 0.134   |
| Trunk                 | 1.94            | (1.31-2.88) | 0.001   | 1.90                  | (1.28-2.82) | 0.001   | 1.19                  | (0.71-1.98) | 0.510   |
| <b>Smoking Status</b> |                 |             |         |                       |             |         |                       |             |         |
| Current               | 1.68            | (1.09-2.61) | 0.019   | 1.86                  | (1.18-2.94) | 0.008   | 1.14                  | (0.65-2.01) | 0.652   |
| Former                | 1.03            | (0.70-1.51) | 0.888   | 1.09                  | (0.73-1.62) | 0.681   | 0.76                  | (0.45-1.28) | 0.299   |
| Never (ref)           | 1.00            |             |         | 1.00                  |             |         | 1.00                  |             |         |

**eTable 3.** Multivariate MSS by SLNB Status, MSLT2

| Parameter             | SLNB Negative (n=2302) |             |         | SLNB Positive (n=2157) |             |         |
|-----------------------|------------------------|-------------|---------|------------------------|-------------|---------|
|                       | HR                     | 95% CI      | p-value | HR                     | 95% CI      | p-value |
| <b>Age, years</b>     | 1.02                   | (1.00-1.03) | 0.008   | 1.01                   | (1.00-1.02) | 0.012   |
| <b>Gender</b>         |                        |             |         |                        |             |         |
| Female (ref)          | 1.00                   |             |         | 1.00                   |             |         |
| Male                  | 1.40                   | (0.95-2.06) | 0.085   | 1.28                   | (1.04-1.57) | 0.018   |
| <b>Breslow, mm</b>    | 1.08                   | (1.04-1.12) | <0.001  | 1.12                   | (1.09-1.15) | <0.001  |
| <b>Ulceration</b>     |                        |             |         |                        |             |         |
| Absent (ref)          | 1.00                   |             |         | 1.00                   |             |         |
| Present               | 3.05                   | (2.17-4.28) | <0.001  | 2.29                   | (1.90-2.76) | <0.001  |
| <b>Primary Site</b>   |                        |             |         |                        |             |         |
| Extremity (ref)       | 1.00                   |             |         | 1.00                   |             |         |
| Head/Neck             | 1.71                   | (1.05-2.79) | 0.031   | 1.10                   | (0.82-1.48) | 0.529   |
| Trunk                 | 1.48                   | (1.00-2.18) | 0.049   | 1.19                   | (0.97-1.45) | 0.099   |
| <b>Smoking Status</b> |                        |             |         |                        |             |         |
| Current               | 1.75                   | (1.13-2.70) | 0.012   | 1.28                   | (1.02-1.61) | 0.033   |
| Former                | 1.17                   | (0.79-1.72) | 0.436   | 0.95                   | (0.76-1.19) | 0.664   |
| Never (ref)           | 1.00                   |             |         | 1.00                   |             |         |

**eTable 4.** Multivariate MSS by RT-PCR vs Histopathologic Analysis

| Parameter             | RT-PCR Pos (n=221) |             |         | Histopathologic Pos (n=2139) |             |         |
|-----------------------|--------------------|-------------|---------|------------------------------|-------------|---------|
|                       | HR                 | 95% CI      | p-value | HR                           | 95% CI      | p-value |
| <b>Age, years</b>     | 1.01               | (0.98-1.05) | 0.549   | 1.01                         | (1.00-1.02) | 0.003   |
| <b>Gender</b>         |                    |             |         |                              |             |         |
| Female (ref)          | 1.00               |             |         | 1.00                         |             |         |
| Male                  | 1.89               | (0.65-5.51) | 0.244   | 1.24                         | (1.03-1.50) | 0.026   |
| <b>Breslow, mm</b>    | 1.02               | (0.78-1.33) | 0.890   | 1.11                         | (1.09-1.14) | <0.001  |
| <b>Ulceration</b>     |                    |             |         |                              |             |         |
| Absent (ref)          | 1.00               |             |         | 1.00                         |             |         |
| Present               | 2.37               | (1.01-5.56) | 0.048   | 2.17                         | (1.81-2.59) | <0.001  |
| <b>Primary Site</b>   |                    |             |         |                              |             |         |
| Extremity (ref)       | 1.00               |             |         | 1.00                         |             |         |
| Head/Neck             | 2.59               | (0.69-9.71) | 0.158   | 1.28                         | (0.96-1.72) | 0.093   |
| Trunk                 | 2.68               | (0.68-10.6) | 0.160   | 1.16                         | (0.96-1.40) | 0.128   |
| <b>Smoking Status</b> |                    |             |         |                              |             |         |
| Current               | 1.28               | (0.38-2.07) | 0.690   | 1.27                         | (1.03-1.58) | 0.028   |
| Former                | 0.59               | (0.21-1.68) | 0.320   | 0.97                         | (0.79-1.20) | 0.800   |
| Never (ref)           | 1.00               |             |         | 1.00                         |             |         |

**eTable 5.** Multivariate MSS in Current and Former Smokers

| Parameter               | Current/Former Smokers<br>(n=2586) |             |         |
|-------------------------|------------------------------------|-------------|---------|
|                         | HR                                 | 95% CI      | p-value |
| <b>Age, years</b>       | 1.02                               | (1.01-1.03) | <0.001  |
| <b>Gender</b>           |                                    |             |         |
| Female (ref)            | 1.00                               |             |         |
| Male                    | 1.12                               | (0.91-1.39) | 0.290   |
| <b>Breslow, mm</b>      | 1.13                               | (1.10-1.16) | <0.001  |
| <b>Ulceration</b>       |                                    |             |         |
| Absent (ref)            | 1.00                               |             |         |
| Present                 | 2.17                               | (1.80-2.62) | <0.001  |
| <b>Primary Site</b>     |                                    |             |         |
| Extremity (ref)         | 1.00                               |             |         |
| Head/Neck               | 1.26                               | (0.95-1.67) | 0.110   |
| Trunk                   | 1.41                               | (1.14-1.74) | 0.002   |
| <b>SLNB Status</b>      |                                    |             |         |
| No SLNB                 | 1.57                               | (1.20-2.06) | 0.001   |
| SLNB Negative (ref)     | 1.00                               |             |         |
| SLNB Positive           | 2.05                               | (1.66-2.54) | <0.001  |
| <b>Smoking Status</b>   |                                    |             |         |
| Current                 | 1.48                               | (1.18-1.86) | <0.001  |
| Former (ref)            | 1.00                               |             |         |
| <b># Cigarettes/day</b> |                                    |             |         |
| 1-9 (ref)               | 1.00                               |             |         |
| 10-19                   | 1.12                               | (0.86-1.46) | 0.387   |
| 20+                     | 1.20                               | (0.94-1.52) | 0.146   |
| <b># Years Smoked</b>   | 1.00                               | (0.99-1.00) | 0.334   |

**eTable 6.** Multivariate MSS by SLNB Status in Current and Former Smokers

| Parameter               | No SLNB<br>(n=386) |             |         | SLNB Negative<br>(n=1246) |             |         | SLNB Positive<br>(n=954) |             |         |
|-------------------------|--------------------|-------------|---------|---------------------------|-------------|---------|--------------------------|-------------|---------|
|                         | HR                 | 95% CI      | p-value | HR                        | 95% CI      | p-value | HR                       | 95% CI      | p-value |
| <b>Age, years</b>       | 1.00               | (0.98-1.02) | 0.878   | 1.02                      | (1.00-1.03) | 0.056   | 1.02                     | (1.01-1.03) | 0.002   |
| <b>Gender</b>           |                    |             |         |                           |             |         |                          |             |         |
| Female (ref)            | 1.00               |             |         | 1.00                      |             |         | 1.00                     |             |         |
| Male                    | 1.24               | (0.73-2.10) | 0.423   | 1.08                      | (0.72-1.60) | 0.713   | 1.09                     | (0.82-1.46) | 0.552   |
| <b>Breslow, mm</b>      | 1.22               | (1.13-1.33) | <0.001  | 1.16                      | (1.09-1.24) | <0.001  | 1.11                     | (1.08-1.15) | <0.001  |
| <b>Ulceration</b>       |                    |             |         |                           |             |         |                          |             |         |
| Absent (ref)            | 1.00               |             |         | 1.00                      |             |         | 1.00                     |             |         |
| Present                 | 1.72               | (1.12-2.66) | 0.014   | 2.79                      | (1.98-3.94) | <0.001  | 1.98                     | (1.53-2.58) | <0.001  |
| <b>Primary Site</b>     |                    |             |         |                           |             |         |                          |             |         |
| Extremity (ref)         | 1.00               |             |         | 1.00                      |             |         | 1.00                     |             |         |
| Head/Neck               | 1.74               | (0.90-3.34) | 0.099   | 1.34                      | (0.79-2.26) | 0.278   | 1.03                     | (0.68-1.55) | 0.883   |
| Trunk                   | 2.36               | (1.34-4.16) | 0.003   | 1.75                      | (1.19-2.57) | 0.004   | 1.13                     | (0.85-1.50) | 0.401   |
| <b>Smoking Status</b>   |                    |             |         |                           |             |         |                          |             |         |
| Current                 | 1.29               | (0.75-2.24) | 0.360   | 1.64                      | (1.08-2.49) | 0.020   | 1.49                     | (1.10-2.03) | 0.011   |
| Former (ref)            | 1.00               |             |         | 1.00                      |             |         |                          |             |         |
| <b># Cigarettes/day</b> |                    |             |         |                           |             |         |                          |             |         |
| 1-9 (ref)               | 1.00               |             |         | 1.00                      |             |         | 1.00                     |             |         |
| 10-19                   | 0.59               | (0.32-1.10) | 0.096   | 1.32                      | (0.81-2.14) | 0.266   | 1.19                     | (0.83-1.73) | 0.345   |
| 20+                     | 0.63               | (0.37-1.06) | 0.085   | 1.18                      | (0.74-1.88) | 0.492   | 1.47                     | (1.05-2.06) | 0.025   |
| <b># Years Smoked</b>   | 1.01               | (0.99-1.03) | 0.206   | 1.00                      | (0.98-1.02) | 0.904   | 0.99                     | (0.98-1.00) | 0.033   |

**eTable 7.** Multivariate MSS in Current and Never Smokers

| Parameter               | Current/Never Smokers<br>(n=4536) |             |         |
|-------------------------|-----------------------------------|-------------|---------|
|                         | HR                                | 95% CI      | p-value |
| <b>Age, years</b>       | 1.02                              | (1.01-1.02) | <0.001  |
| <b>Gender</b>           |                                   |             |         |
| Female (ref)            | 1.00                              |             |         |
| Male                    | 1.29                              | (1.09-1.52) | 0.003   |
| <b>Breslow, mm</b>      | 1.09                              | (1.07-1.11) | <0.001  |
| <b>Ulceration</b>       |                                   |             |         |
| Absent (ref)            | 1.00                              |             |         |
| Present                 | 2.34                              | (2.00-2.73) | <0.001  |
| <b>Primary Site</b>     |                                   |             |         |
| Extremity (ref)         | 1.00                              |             |         |
| Head/Neck               | 1.18                              | (0.93-1.50) | 0.167   |
| Trunk                   | 1.31                              | (1.10-1.56) | 0.002   |
| <b>SLNB Status</b>      |                                   |             |         |
| No SLNB                 | 1.76                              | (1.37-2.26) | <0.001  |
| SLNB Negative (ref)     | 1.00                              |             |         |
| SLNB Positive           | 2.52                              | (2.11-2.99) | <0.001  |
| <b># Cigarettes/day</b> |                                   |             |         |
| 0 (ref)                 |                                   |             |         |
| 1-9                     | 1.13                              | (0.81-1.58) | 0.471   |
| 10-19                   | 1.48                              | (1.13-1.93) | 0.004   |
| 20+                     | 1.63                              | (1.33-2.01) | <0.001  |

**eTable 8.** Multivariate MSS by SLNB Status in Current and Never Smokers

| Parameter               | No SNB<br>(n=478) |             |         | SNB Negative<br>(n=2304) |             |         | SNB Positive<br>(n=1754) |             |         |
|-------------------------|-------------------|-------------|---------|--------------------------|-------------|---------|--------------------------|-------------|---------|
|                         | HR                | 95% CI      | p-value | HR                       | 95% CI      | p-value | HR                       | 95% CI      | p-value |
| <b>Age, years</b>       | 1.03              | (1.01-1.04) | 0.002   | 1.02                     | (1.00-1.02) | 0.039   | 1.01                     | (1.00-1.02) | 0.021   |
| <b>Gender</b>           |                   |             |         |                          |             |         |                          |             |         |
| Female (ref)            | 1.00              |             |         | 1.00                     |             |         | 1.00                     |             |         |
| Male                    | 1.51              | (0.95-2.40) | 0.084   | 1.11                     | (0.81-1.51) | 0.515   | 1.31                     | (1.05-1.62) | 0.015   |
| <b>Breslow, mm</b>      | 1.09              | (1.05-1.13) | <0.001  | 1.08                     | (1.04-1.12) | <0.001  | 1.10                     | (1.07-1.14) | <0.001  |
| <b>Ulceration</b>       |                   |             |         |                          |             |         |                          |             |         |
| Absent (ref)            | 1.00              |             |         | 1.00                     |             |         | 1.00                     |             |         |
| Present                 | 1.84              | (1.22-2.79) | 0.004   | 2.36                     | (1.76-3.17) | <0.001  | 2.46                     | (2.00-3.02) | <0.001  |
| <b>Primary Site</b>     |                   |             |         |                          |             |         |                          |             |         |
| Extremity (ref)         | 1.00              |             |         | 1.00                     |             |         | 1.00                     |             |         |
| Head/Neck               | 0.93              | (0.48-1.81) | 0.828   | 1.62                     | (1.06-2.48) | 0.026   | 1.09                     | (0.79-1.50) | 0.614   |
| Trunk                   | 1.78              | (1.10-2.88) | 0.018   | 1.44                     | (1.04-2.01) | 0.030   | 1.19                     | (0.96-1.48) | 0.120   |
| <b># Cigarettes/day</b> |                   |             |         |                          |             |         |                          |             |         |
| 0 (ref)                 | 1.00              |             |         | 1.00                     |             |         | 1.00                     |             |         |
| 1-9                     | 1.86              | (0.88-3.94) | 0.106   | 1.76                     | (1.04-2.98) | 0.035   | 0.70                     | (0.41-1.19) | 0.189   |
| 10-19                   | 2.30              | (1.10-4.80) | 0.026   | 1.89                     | (1.12-3.19) | 0.017   | 1.24                     | (0.88-1.74) | 0.225   |
| 20+                     | 1.49              | (0.84-2.63) | 0.173   | 2.06                     | (1.36-3.13) | <0.001  | 1.47                     | (1.12-1.92) | 0.005   |
