# Supplementary material for: Smoking Status and Survival in Patients With Early-Stage Primary Cutaneous Melanoma
Source: PubMed Central journal article supplement (PMC10848058; doi:10.1001/jamanetworkopen.2023.54751), 2024-02-06
Supplement: jamanetwopen-e2354751-s002.pdf [file jamanetwopen-e2354751-s002.pdf]

## Data Sharing Statement

Jackson. Smoking Status and Survival in Patients With Early-Stage Primary Cutaneous Melanoma. *JAMA Netw Open*. Published February 06, 2024.  
doi:10.1001/jamanetworkopen.2023.54751

### Data

**Data available:** No
